# Supplementary material for: Combined detection of serum IL-6 and CEA contributes to the diagnosis of lung adenocarcinoma in situ
Source: PeerJ. 2024 Mar 22;12:e17141. doi: 10.7717/peerj.17141 (PMC10962332; doi:10.7717/peerj.17141)
Supplement: Supplemental Information 2 [file peerj-12-17141-s002.xlsx]

## Sheet: Sheet1
IL-6			CEA			CF211
AIS	BPN	HC	AIS	BPN	HC	AIS	BPN	HC
2.32	0.59	0.24	6.5	9.128	0.2	1.39	1.43	3.45
1.19	3.31	0.76	0.5	2.56	1.9	1.02	1.2	2.91
1.29	0.85	0.81	6.52	1.313	2.15	1.2	1.2	3.98
2.1	1.21	2.34	0.9	2.71	1.21	3.87	1.2	1.34
1.11	0.58	1.43	17.73	2.972	0.2	2.738	1.2	1.83
1.47	1.03	6.17	2.028	4.187	0.49	1.48	2.45	2.9
7.17	2.53	0.89	71.34	6.484	1.08	0.2	4.23	2.71
2.51	1.31	0.8	7.753	1.29	2.42	2.38	3.54	3.87
1.11	1.22	0.51	0.502	2.106	0.44	1.98	2.938	3.928
5.66	0.86	0.59	2.423	1.874	1.17	1.73	1.43	1.28
1.37	0.77	0.69	0.5	3.02	2.99	2.47	1.2	3.28
1.47	0.84	1.43	10.5	0.78	0.2	1.21	1.2	2.39
0.83	1.39	0.7	2.593	1.198	1.56	1.28	1.43	2.89
0.74	1.21	1.85	1.147	0.699	4.2	1.48	0.83	1.98
0.56	0.56	0.52	0.717	1.202	2.69	1.08	3.88	2.38
11.76	1.11	0.79	0.856	3.374	1.09	1.43	4.98	3.99
1.94	0.58	0.98	5.498	2.276	2.23	3.38	0.64	1.77
0.93	1.49	0.86	0.5	1.413	1.72	2.87	3.53	1.47
1.28	1	0.96	9.09	4.56	1.72	3.34	1.43	1.94
0.94	1.11	0.67	0.745	1.033	1.94	3.38	2.49	1.56
1.29	0.57	0.78	0.691	1.572	0.58	3.738	1.43	2.83
1.37	1.12	1.49	1.939	1.398	1.17	2.87	1.87	2.93
0.92	0.64	1.04	4.528	0.968	2.71	3.49	3.4	1.2
1.18	1.38	2.11	1.198	0.615	1.12	3.87	1.89	1.56
1.09	1.49	5.46	2.622	1.165	2.22	2.2	1.43	3.56
0.84	0.56	0.96	4.567	1.763	0.37	3.47	1.56	1.71
1.75	1.11	1.17	11.313	0.518	0.46	1.98	1.2	3.1
1.21	1.58	1.23	2.366	2.589	0.27	1.09	0.77	2.12
1.56	1.08	0.8	1.166	0.02	2.47	3.47	3.67	1.92
1.28	1.47	1.35	1.761	0.34	0.59	3.49	4.54	0.27
2.74	0.7	1.42	1.877	1.23	0.9	1.76	1.49	1.99
1.45	1.08	0.9	1.47	2.34	0.58	3.88	0.43	0.2
1.17	1.52	0.5	0.595	9.34	0.36	0.38	0.2	2.99
2.89	0.57	1.01	17.057	0.89	0.45	2.67	2.2	1.45
1.18	0.4	0.78	0.5	1.45	1.67	1.73	2.2	1.57
1.09	0.54	1.58	0.5	2.93	2.34	1.39	0.57	1.33
1	1.17	0.55	0.5	0.456	0.45	2.99	1.83	0.2
0.55	2.36	0.51	3.407	0.239	1.68	1.387	3.584	1.56
0.82	2.97	3.63	1.737	1.098	2.1	1.98	1.48	1.2
4.65	2.31	1.34	2.98	1.562	3.1	1.03	1.69	1.2
0.92	0.87	1.65	0.5	3.007	2.5	3.48	3.58	1.94
0.7	2.7	1.45	2.11	0.87	0.46	2.99	3.64	3.02
1.11	0.57	0.38	9.98	0.5	0.83	3.09	1.43	2.9
0.5	3.99	0.66	0.93	0.823	0.18	3.48	2.48	2.45
1.36	3.16	1.11	0.56	1.296	0.48	1.66	0.44	1.23
0.46	0.55	0.56	0.83	4.001	1.23	3.84	1.45	3.53
0.87	0.97	1.82	4.78	3.09	1.1	4.2	1.54	5.5
3.24	0.9	1.32	2.09	0.5	1.23	3.2	5.54	4.4
1.38	1.3	0.99	0.5	0.74	0.64	2.2	0.2	2.55
0.55	1.34	1.12	0.67	0.89	0.98	1.49	1.122	0.2
0.53	2.09	0.42	0.83	0.6	0.5	1.8	0.2	1.45
0.44	1.36	0.25	0.82	0.63	0.5	3.49	3.54	2.653
20.8	1.98	1.34	21.98	0.5	1.09	4.23	1.88	1.53
0.85	0.98	0.23	14.92	1.98	2.1	1.2	0.5	1.65
0.67	1.54	1.23	2.98	3.98	1.1	0.48	5.54	0.43
0.4	1.87	0.56	1.23	0.92	3.01	5.5	1.33	5.66
2.43	0.89	0.67	1.83	2.98	0.9	3.3	1.55	2.35
0.71	0.45	0.58	3.89	1.28	0.34	0.98	1.54	1.66
0.31	2.01	0.78	5.05	2.93	0.76	1.99	1.04	0.53
3.32	0.56	2.01	0.74	1.35	0.89	1.38	0.54	3.65
0.8	1.78	1.23	30.74	0.6	0.82	3.28	0.88	0.74
14.1	0.98	2.01	0.5	0.87	0.72	1.4	1.34	1.66
11.25	1.78	1.09	0.93	0.87	0.87	1.98	2.2	5.75
0.56	2.43	0.24	7.88	3.78	0.87	3.46	4.2	1.4
8.19	0.89	0.23	1.93	0.87	1.98	2.51	0.2	1.34
