# Supplementary material for: Combined detection of serum IL-6 and CEA contributes to the diagnosis of lung adenocarcinoma in situ
Source: PeerJ. 2024 Mar 22;12:e17141. doi: 10.7717/peerj.17141 (PMC10962332; doi:10.7717/peerj.17141)
Supplement: Supplemental Information 3 [file peerj-12-17141-s003.xlsx]

## Sheet: Sheet1
IL-6			CEA			CF211
AIS	BPN	HC	AIS	BPN	HC	AIS	BPN	HC
0.34	5.78	0.54	1.98	1.28	1.93	4.2	1.34	2.66
1.23	1.23	0.65	9.5	1.9	2.94	1.2	5.43	0.2
11.98	0.56	0.67	0.6	1.76	4.01	1.48	1.43	1.2
0.23	1.23	1.23	0.87	4.38	1.37	2.2	2.33	1.8
6.98	2.31	1.24	0.87	0.87	0.78	1.42	0.43	2.5
2.89	0.23	1.43	43.78	0.5	0.5	1.49	0.87	2.04
0.78	0.24	0.56	0.87	0.5	1.08	2.4	0.2	1.99
1.24	0.56	0.76	1.28	0.5	2.09	1.2	1.34	0.33
7.98	0.27	0.67	1.9	0.83	0.5	3.98	3	1.88
0.78	0.89	1.23	1.76	2.84	0.78	3.4	1.72	3.5
2.5	1.36	1.98	4.38	3.58	0.89	1.78	2.81	1.2
2.08	0.53	2.98	0.87	0.87	0.5	0.9	1.41	1.2
5.67	1.24	0.32	0.5	2.99	0.5	1.8	1.54	2.2
0.23	1.56	0.34	0.5	0.94	0.84	0.2	0.2	1.55
1.09	1.23	0.56	22.05	0.5	1.94	3.44	0.2	2.4
35.89	1.57	0.67	0.83	1.57	3	0.2	1.43	2.22
0.37	0.32	0.84	2.84	0.73	0.5	2.45	2.23	4.4
1.45	0.29	1.02	3.58	0.89	0.95	1.58	0.43	3.67
0.78	0.35	0.34	0.87	0.93	0.87	1.61	0.2	7.73
4.98	0.35	1.09	2.98	0.5	0.81	1.49	1.03	2.99
8.02	1.98	1.34	2.98	2.83	2.93	0.2	1.45	1.849
45.89	3.57	0.56	5.09	4.7	3.29	1.98	1.99	1.84
0.21	6.87	0.24	0.87	2.98	1.98	1.87	0.43	0.588
0.67	0.23	0.45	0.5	0.78	0.94	2.88	0.4	3.49
2.98	0.23	0.62	10.98	0.87	0.5	1.73	2.09	3.45
3.25	1.23	0.74	0.5	0.98	0.85	2.2	1.3	1.2
0.98	0.24	1.09	0.83	0.8	0.89	1.89	0.2	0.2
2.35	0.43	2.35	23.98	0.5	0.5	2.5	1.2	1.2
3.45	0.45	0.56	1.93	1.39	1	2.8	2.94	3.78
4.01	0.94	2.45	0.5	0.87	1.03	4.43	3.48	2.45
0.34	1.73	1.04	4.98	2.8	1.34	1.5	3.65	1.33
1.89	1.82	1.08	7.03	0.78	0.98	1.2	1.76	1.58
1.38	1.09	2.08	0.74	0.98	0.5	1.87	4.49	3.43
42	0.03	1.74	2.98	0.5	0.5	4.3	3.59	3.54
2.21	1.32	0.56	0.5	2.12	1.34	1.13	1.92	1.43
